# Supplementary material for: Hepatobiliary Thyroid Hormone Deficiency Impacts Bile Acid Hydrophilicity and Aquaporins in Cholestatic C57BL/6J Mice
Source: Int J Mol Sci. 2022 Oct 15;23(20):12355. doi: 10.3390/ijms232012355 (PMC9603918; doi:10.3390/ijms232012355)
Supplement: Supplementary file 1 [file ijms-23-12355-s001.zip]

Archive with 11 entries (10 files):
- Kube et al_Supplementary Figure S1.tif
- Kube et al_Supplementary Figure S2.tif
- Kube et al_Supplementary Figure S3.tif
- Kube et al_Supplementary Legends S1-S3_IJMS_R.pdf
- Kube et al_Supplementary Tables S1-S3_IJMS_R.pdf
- __MACOSX/
- __MACOSX/._Kube et al_Supplementary Figure S1.tif
- __MACOSX/._Kube et al_Supplementary Figure S2.tif
- __MACOSX/._Kube et al_Supplementary Figure S3.tif
- __MACOSX/._Kube et al_Supplementary Legends S1-S3_IJMS_R.docx
- __MACOSX/._Kube et al_Supplementary Tables S1-S3_IJMS_R.docx
