# Supplementary material for: Hepatobiliary Thyroid Hormone Deficiency Impacts Bile Acid Hydrophilicity and Aquaporins in Cholestatic C57BL/6J Mice
Source: Int J Mol Sci. 2022 Oct 15;23(20):12355. doi: 10.3390/ijms232012355 (PMC9603918; doi:10.3390/ijms232012355)
Supplement: Supplementary file 1 [file ijms-23-12355-s001.zip › Kube et al_Supplementary Tables S1-S3_IJMS_R.pdf]

**Supplementary Table S1.** Serum total thyroxine (TT4) concentrations [ $\mu\text{g/dL}$ ]. Detection limit of 0.5  $\mu\text{g/dL}$ . mRNA expression (fold-change) of hepatic deiodinase 1 (*Dio1*) and thyroxine-binding globulin (*Tbg*) under hypo, litho and litho+hypo relative to control conditions by quantitative RT-PCR. *18S* (18S ribosomal RNA), *Ppia* (peptidylprolyl isomerase A, cyclophilin A) and *Rpl13 a* (ribosomal protein L13a) were used as reference genes, efficiency corrected Ct method. Data are presented as mean $\pm$ SEM, one-way ANOVA followed by Bonferroni *post hoc* analysis, \*\* $p < 0.01$ , \*\*\* $p < 0.001$  # $p < 0.0001$ ; n.d.: not detected; §data from Kube et al.; <https://doi.org/10.1055/a-1404-7939>; n=6-8/condition.

| Parameter                                      | Time<br>(weeks) | Control         | Hypo                         | Litho                        | Litho+Hypo                   |
|------------------------------------------------|-----------------|-----------------|------------------------------|------------------------------|------------------------------|
| TT4 $\pm$ SEM<br>[ $\mu\text{g/dL}$ ]          | 2               | 3.63 $\pm$ 0.29 | 1.45 $\pm$ 0.40**            | 6.21 $\pm$ 0.57***           | 0.89 $\pm$ 0.04***           |
|                                                | 4               | 2.27 $\pm$ 0.26 | 0.18 $\pm$ 0.01 <sup>#</sup> | 4.56 $\pm$ 0.09 <sup>#</sup> | 0.50 $\pm$ 0.04 <sup>#</sup> |
|                                                | 6 <sup>§</sup>  | 3.63 $\pm$ 0.24 | 0.28 $\pm$ 0.05 <sup>#</sup> | 5.03 $\pm$ 0.24 <sup>#</sup> | 0.41 $\pm$ 0.05 <sup>#</sup> |
| hepatic <i>Dio1</i> $\pm$ SEM<br>(fold-change) | 2               | 1.00 $\pm$ 0.12 | n.d.                         | 0.38 $\pm$ 0.04 <sup>#</sup> | n.d.                         |
|                                                | 4               | 1.00 $\pm$ 0.05 | n.d.                         | 0.36 $\pm$ 0.03 <sup>#</sup> | n.d.                         |
|                                                | 6 <sup>§</sup>  | 1.00 $\pm$ 0.04 | n.d.                         | 0.34 $\pm$ 0.03 <sup>#</sup> | n.d.                         |
| hepatic <i>Tbg</i> $\pm$ SEM<br>(fold-change)  | 2               | 1.00 $\pm$ 0.13 | 2.16 $\pm$ 0.19              | 1.98 $\pm$ 0.21              | 8.99 $\pm$ 0.77 <sup>#</sup> |
|                                                | 4               | 1.00 $\pm$ 0.07 | 4.97 $\pm$ 0.38 <sup>#</sup> | 1.63 $\pm$ 0.12              | 5.48 $\pm$ 0.31 <sup>#</sup> |
|                                                | 6 <sup>§</sup>  | 1.00 $\pm$ 0.08 | 8.04 $\pm$ 0.70 <sup>#</sup> | 1.09 $\pm$ 0.11              | 9.32 $\pm$ 0.94 <sup>#</sup> |

**Supplementary Table S2.** Bile acid derivates in bile of 2, 4 and 6 weeks treated female **C57BL/6J** mice.

CA – cholic acid, CDCA - chenodeoxycholic acid, DCA – deoxycholic acid, LCA – lithocholic acid, MCA $\alpha/\beta/\sigma$  – murine cholic acid isoforms  $\alpha/\beta/\sigma$ , UDCA – ursodeoxycholic acid, T and G prefixes denotes glycine and taurine conjugation. Data are represented as mean in  $\mu\text{mol/mL} \pm \text{SEM}$ . ULOD: under lower limit of detection; n=4-8/condition.

| Primary<br>BAs | BA<br>derivate | Time  | Control<br>[ $\mu\text{mol/mL}$ ] | Hypo<br>[ $\mu\text{mol/mL}$ ] | Litho<br>[ $\mu\text{mol/mL}$ ] | Litho+Hypo<br>[ $\mu\text{mol/mL}$ ] | Secondary<br>BAs | BA<br>derivate | Time  | Control<br>[ $\mu\text{mol/mL}$ ] | Hypo<br>[ $\mu\text{mol/mL}$ ] | Litho<br>[ $\mu\text{mol/mL}$ ] | Litho+Hypo<br>[ $\mu\text{mol/mL}$ ] |
|----------------|----------------|-------|-----------------------------------|--------------------------------|---------------------------------|--------------------------------------|------------------|----------------|-------|-----------------------------------|--------------------------------|---------------------------------|--------------------------------------|
| hydrophilic    | TCA-S          | 2 wks | 0.15 $\pm$ 0.02                   | 0.14 $\pm$ 0.04                | 0.04 $\pm$ 0.003                | 0.01 $\pm$ 0.003                     | hydrophilic      | $\omega$ MCA   | 2 wks | 0.58 $\pm$ 0.15                   | 0.29 $\pm$ 0.03                | 0.04 $\pm$ 0.009                | 0.009 $\pm$ 0.002                    |
|                |                | 4 wks | 0.17 $\pm$ 0.01                   | 0.02 $\pm$ 0.002               | 0.05 $\pm$ 0.004                | 0.003 $\pm$ 0.001                    |                  |                | 4 wks | 0.52 $\pm$ 0.13                   | 0.04 $\pm$ 0.008               | 0.03 $\pm$ 0.007                | 0.006 $\pm$ 0.001                    |
|                |                | 6 wks | 0.56 $\pm$ 0.07                   | 0.007 $\pm$ 0.0009             | 0.06 $\pm$ 0.01                 | 0.001 $\pm$ 0.0001                   |                  |                | 6 wks | 0.54 $\pm$ 0.15                   | 0.09 $\pm$ 0.03                | 0.06 $\pm$ 0.02                 | 0.03 $\pm$ 0.01                      |
|                | CA-S           | 2 wks | 0.05 $\pm$ 0.02                   | 0.04 $\pm$ 0.009               | 0.01 $\pm$ 0.002                | 0.005 $\pm$ 0.001                    |                  | TUDCA          | 2 wks | 6.82 $\pm$ 0.92                   | 6.23 $\pm$ 0.86                | 0.83 $\pm$ 0.05                 | 0.31 $\pm$ 0.01                      |
|                |                | 4 wks | 0.05 $\pm$ 0.003                  | 0.003 $\pm$ 0.0002             | 0.008 $\pm$ 0.001               | 0.001 $\pm$ 0.0005                   |                  |                | 4 wks | 8.12 $\pm$ 0.41                   | 3.01 $\pm$ 0.47                | 0.92 $\pm$ 0.19                 | 0.29 $\pm$ 0.01                      |
|                |                | 6 wks | 0.09 $\pm$ 0.02                   | 0.001 $\pm$ 0.0006             | 0.008 $\pm$ 0.002               | ULOD                                 |                  |                | 6 wks | 7.37 $\pm$ 0.38                   | 2.55 $\pm$ 0.15                | 0.95 $\pm$ 0.08                 | 0.24 $\pm$ 0.02                      |
|                | TMCA           | 2 wks | 93.31 $\pm$ 10.71                 | 75.21 $\pm$ 11.07              | 13.41 $\pm$ 1.44                | 2.91 $\pm$ 0.18                      |                  | UDCA           | 2 wks | 0.005 $\pm$ 0.001                 | 0.003 $\pm$ 0.001              | ULOD                            | ULOD                                 |
|                |                | 4 wks | 89.24 $\pm$ 4.62                  | 27.23 $\pm$ 2.96               | 13.03 $\pm$ 2.93                | 2.59 $\pm$ 0.15                      |                  |                | 4 wks | 0.004 $\pm$ 0.001                 | 0.001 $\pm$ 0.0004             | ULOD                            | ULOD                                 |
|                |                | 6 wks | 130.38 $\pm$ 8.31                 | 29.22 $\pm$ 2.34               | 14.25 $\pm$ 0.95                | 3.15 $\pm$ 0.16                      |                  |                | 6 wks | 0.004 $\pm$ 0.001                 | 0.003 $\pm$ 0.001              | 0.002 $\pm$ 0.001               | 0.003 $\pm$ 0.001                    |
|                | $\alpha$ MCA   | 2 wks | 1.53 $\pm$ 0.47                   | 0.72 $\pm$ 0.14                | 0.06 $\pm$ 0.02                 | 0.03 $\pm$ 0.01                      |                  | HDCA           | 2 wks | 0.005 $\pm$ 0.002                 | 0.002 $\pm$ 0.001              | ULOD                            | ULOD                                 |
|                |                | 4 wks | 1.01 $\pm$ 0.15                   | 0.13 $\pm$ 0.02                | 0.05 $\pm$ 0.01                 | 0.03 $\pm$ 0.008                     |                  |                | 4 wks | 0.006 $\pm$ 0.002                 | ULOD                           | ULOD                            | ULOD                                 |
|                |                | 6 wks | 1.09 $\pm$ 0.30                   | 0.37 $\pm$ 0.21                | 0.15 $\pm$ 0.06                 | 0.05 $\pm$ 0.02                      |                  |                | 6 wks | 0.004 $\pm$ 0.001                 | 0.004 $\pm$ 0.003              | ULOD                            | ULOD                                 |
|                | $\beta$ MCA    | 2 wks | 1.41 $\pm$ 0.43                   | 0.51 $\pm$ 0.06                | 0.12 $\pm$ 0.05                 | 0.03 $\pm$ 0.01                      |                  |                |       |                                   |                                |                                 |                                      |
|                |                | 4 wks | 0.78 $\pm$ 0.16                   | 0.07 $\pm$ 0.01                | 0.06 $\pm$ 0.01                 | 0.01 $\pm$ 0.004                     |                  |                |       |                                   |                                |                                 |                                      |
|                |                | 6 wks | 1.72 $\pm$ 0.49                   | 0.13 $\pm$ 0.06                | 0.22 $\pm$ 0.09                 | 0.03 $\pm$ 0.01                      |                  |                |       |                                   |                                |                                 |                                      |
|                | 7-DHCA         | 2 wks | 1.55 $\pm$ 0.47                   | 0.69 $\pm$ 0.13                | 0.47 $\pm$ 0.12                 | 0.37 $\pm$ 0.09                      |                  |                |       |                                   |                                |                                 |                                      |
|                |                | 4 wks | 1.35 $\pm$ 0.23                   | 0.21 $\pm$ 0.05                | 0.25 $\pm$ 0.09                 | 0.36 $\pm$ 0.12                      |                  |                |       |                                   |                                |                                 |                                      |
|                |                | 6 wks | 0.81 $\pm$ 0.28                   | 0.15 $\pm$ 0.07                | 0.42 $\pm$ 0.14                 | 0.44 $\pm$ 0.15                      |                  |                |       |                                   |                                |                                 |                                      |
|                | 12-DHCA        | 2 wks | 0.55 $\pm$ 0.14                   | 0.19 $\pm$ 0.02                | 0.06 $\pm$ 0.01                 | 0.04 $\pm$ 0.004                     |                  |                |       |                                   |                                |                                 |                                      |
|                |                | 4 wks | 0.51 $\pm$ 0.14                   | 0.08 $\pm$ 0.02                | 0.03 $\pm$ 0.002                | 0.03 $\pm$ 0.004                     |                  |                |       |                                   |                                |                                 |                                      |
|                |                | 6 wks | 0.23 $\pm$ 0.05                   | 0.09 $\pm$ 0.03                | 0.05 $\pm$ 0.007                | 0.03 $\pm$ 0.008                     |                  |                |       |                                   |                                |                                 |                                      |
| hydrophobic    | GCA            | 2 wks | 0.13 $\pm$ 0.03                   | 0.31 $\pm$ 0.02                | 0.57 $\pm$ 0.04                 | 0.56 $\pm$ 0.08                      | hydrophobic      | TDCA           | 2 wks | 5.92 $\pm$ 0.88                   | 4.76 $\pm$ 0.91                | 34.52 $\pm$ 5.26                | 42.13 $\pm$ 2.79                     |
|                |                | 4 wks | 0.12 $\pm$ 0.01                   | 0.18 $\pm$ 0.02                | 1.56 $\pm$ 0.89                 | 1.11 $\pm$ 0.18                      |                  |                | 4 wks | 8.37 $\pm$ 0.47                   | 2.52 $\pm$ 0.67                | 32.79 $\pm$ 1.62                | 46.13 $\pm$ 3.29                     |
|                |                | 6 wks | 0.24 $\pm$ 0.02                   | 0.08 $\pm$ 0.006               | 1.84 $\pm$ 0.62                 | 0.94 $\pm$ 0.28                      |                  |                | 6 wks | 6.87 $\pm$ 0.85                   | 2.65 $\pm$ 0.24                | 32.31 $\pm$ 4.23                | 31.03 $\pm$ 3.44                     |
|                | TCA            | 2 wks | 53.74 $\pm$ 8.18                  | 77.19 $\pm$ 7.88               | 139.89 $\pm$ 7.01               | 107.93 $\pm$ 7.33                    |                  | DCA            | 2 wks | 0.005 $\pm$ 0.002                 | ULOD                           | 0.02 $\pm$ 0.006                | 0.06 $\pm$ 0.02                      |
|                |                | 4 wks | 56.94 $\pm$ 2.84                  | 61.39 $\pm$ 5.20               | 136.38 $\pm$ 6.79               | 109.99 $\pm$ 6.05                    |                  |                | 4 wks | 0.004 $\pm$ 0.001                 | ULOD                           | 0.007 $\pm$ 0.001               | 0.04 $\pm$ 0.008                     |
|                |                | 6 wks | 72.88 $\pm$ 4.40                  | 54.98 $\pm$ 4.29               | 142.86 $\pm$ 5.18               | 85.94 $\pm$ 4.79                     |                  |                | 6 wks | 0.003 $\pm$ 0.001                 | ULOD                           | 0.04 $\pm$ 0.01                 | 0.08 $\pm$ 0.04                      |
|                | CA             | 2 wks | 4.19 $\pm$ 1.55                   | 4.03 $\pm$ 0.48                | 5.00 $\pm$ 1.28                 | 5.44 $\pm$ 1.71                      |                  | TLCA           | 2 wks | 0.09 $\pm$ 0.007                  | 0.06 $\pm$ 0.006               | 0.01 $\pm$ 0.002                | 0.01 $\pm$ 0.0008                    |
|                |                | 4 wks | 2.62 $\pm$ 0.33                   | 1.43 $\pm$ 0.48                | 1.87 $\pm$ 0.89                 | 3.73 $\pm$ 1.17                      |                  |                | 4 wks | 0.11 $\pm$ 0.01                   | 0.04 $\pm$ 0.02                | 0.02 $\pm$ 0.002                | 0.02 $\pm$ 0.001                     |
|                |                | 6 wks | 4.44 $\pm$ 1.16                   | 2.45 $\pm$ 1.49                | 5.88 $\pm$ 2.28                 | 6.56 $\pm$ 3.01                      |                  |                | 6 wks | 0.08 $\pm$ 0.009                  | 0.03 $\pm$ 0.004               | 0.02 $\pm$ 0.002                | 0.02 $\pm$ 0.002                     |
|                | CDCA           | 2 wks | 0.003 $\pm$ 0.001                 | 0.002 $\pm$ 0.001              | 0.0006 $\pm$ 0.0002             | ULOD                                 |                  | LCA            | 2 wks | ULOD                              | ULOD                           | ULOD                            | ULOD                                 |
|                |                | 4 wks | 0.001 $\pm$ 0.0003                | 0.0009 $\pm$ 0.0003            | ULOD                            | ULOD                                 |                  |                | 4 wks | 0.0006 $\pm$ 0.0006               | ULOD                           | 0.0004 $\pm$ 0.0001             | ULOD                                 |
|                |                | 6 wks | 0.002 $\pm$ 0.0005                | 0.003 $\pm$ 0.001              | 0.001 $\pm$ 0.0004              | 0.001 $\pm$ 0.0005                   |                  |                | 6 wks | 0.0006 $\pm$ 0.0002               | ULOD                           | ULOD                            | ULOD                                 |
|                | TCDCA          | 2 wks | 4.05 $\pm$ 0.64                   | 4.02 $\pm$ 0.60                | 0.76 $\pm$ 0.05                 | 0.39 $\pm$ 0.02                      |                  |                |       |                                   |                                |                                 |                                      |
|                |                | 4 wks | 3.78 $\pm$ 0.07                   | 3.46 $\pm$ 0.59                | 0.91 $\pm$ 0.17                 | 0.47 $\pm$ 0.04                      |                  |                |       |                                   |                                |                                 |                                      |
|                |                | 6 wks | 4.91 $\pm$ 0.41                   | 3.15 $\pm$ 0.43                | 1.15 $\pm$ 0.09                 | 0.36 $\pm$ 0.03                      |                  |                |       |                                   |                                |                                 |                                      |

**Supplementary Table S3.** Oligonucleotides used for amplification of genes by quantitative RT-PCR. Oligonucleotides were designed using PrimerBlast (NCBI) and synthesized by Eurofins (Eurofins MWG Synthesis, Ebersberg, Germany).

| Gene name                                      | Abbr.          | Sequence (5'→3') For              | Sequence (5'→3') Rev           | Product length<br>(bp) | GC (%)<br>For | GC (%)<br>Rev | Tm (°C)<br>For | Tm (°C)<br>Rev |
|------------------------------------------------|----------------|-----------------------------------|--------------------------------|------------------------|---------------|---------------|----------------|----------------|
| 18S ribosomal RNA                              | <i>18S</i>     | CGG CTA CCA CAT CCA AGG AA        | GCT GGA ATT ACC GCG GCT        | 187                    | 55.0          | 55.0          | 59.4           | 59.3           |
| Multidrug resistance protein 3                 | <i>Abcb4</i>   | GAT GGA TCT TGA GGC AGC GA        | TTC TCT GCC TTG GTT GCT GA     | 88                     | 55.0          | 50.0          | 59.3           | 57.3           |
| ATP-binding cassette sub-family G member 5     | <i>Abcg5</i>   | CTC CGC GGA CTT CTA CAA CA        | CAT GAC CTT GGG GTC CTG AA     | 166                    | 55.0          | 55.0          | 59.3           | 59.3           |
| Aquaporin 1                                    | <i>Aqp1</i>    | CTT GCC ATT GGC TTG TCT GTG G     | CCA GTG GTT TGA GAA GGT GCG G  | 123                    | 54.6          | 54.6          | 62.5           | 62.2           |
| Aquaporin 8                                    | <i>Aqp8</i>    | TAC CTT GGG GAA CAT CAG CG        | TCT GGA CTC ACC ACT TTA GCC    | 159                    | 55.0          | 52.4          | 59.3           | 59.8           |
| Aquaporin 9                                    | <i>Aqp9</i>    | TTG CAA CGG CAG TTG TGA TG        | GGC CAT GAG TCC GTC ATA GT     | 200                    | 50.0          | 55.0          | 57.3           | 59.3           |
| Bile acid-CoA:amino acid N-acyltransferase     | <i>Baat</i>    | CCT CAC TTC CAT AGA GGA ATG TCT T | CAC TCT CCA TCC TGT ATT TTC T  | 85                     | 44.0          | 61.3          | 44.0           | 61.3           |
| Bile salt export pump                          | <i>Bsep</i>    | ACA TCT GTA GGG TTG TTG AGT GA    | CAA AGA AGC CAA CTC GAG CG     | 182                    | 45.0          | 55.0          | 55.3           | 59.3           |
| CytochromeP450 Family7 Subfamily A Member 1    | <i>Cyp7a1</i>  | TTC TGC GAA GGC ATT TGG AC        | GAT TTA GGA AGG CCC GGA GG     | 171                    | 50.0          | 60.0          | 57.3           | 61.4           |
| CytochromeP450 Family27 Subfamily A Member 1   | <i>Cyp27a1</i> | TTT AAG GCA TCC GTG TAG AGC       | CCT CAC CTA TGG GAT CTT CAT G  | 132                    | 47.6          | 50.0          | 57.9           | 60.3           |
| Deiodinase Type 1                              | <i>Dio1</i>    | GGG CAG GAT CTG CTA CAA GG        | CGT GTC TAG GTG GAG TGC AA     | 98                     | 60.0          | 55.0          | 61.4           | 59.3           |
| 3-Hydroxy-3-methylglutaryl-CoA reductase       | <i>Hmgcr</i>   | TCG CTG GTC CTA GAG CTT TC        | CCA GCG ACT ATG AGC GTG AA     | 171                    | 55.0          | 59.4          | 55.0           | 59.4           |
| 3-Phosphoadenosine 5-phosphosulfate synthase 2 | <i>Papss2</i>  | CCC ACC TCA CAG ACC TTC AC        | GGT GGA TTT TTG CTG GTC TCT TT | 187                    | 60.0          | 43.5          | 61.4           | 58.9           |
| Peptidylpropyl isomerase A, cyclophilin A      | <i>Ppia</i>    | CTT GGG CCG CGT CTC CTT CG        | GCG TGT AAA GTC ACC CTG GC     | 160                    | 70.0          | 60.0          | 65.5           | 61.4           |
| Ribosomal protein L13a                         | <i>Rpl13a</i>  | GGG CAG GTT CTG GTA TTG GA        | GGG GTT GGT ATT CAAT CCG CT    | 162                    | 55.0          | 52.4          | 59.3           | 59.8           |
| Sulfotransferase family 2A1                    | <i>Sult2a1</i> | ATC TCC AGC TCA AAG ACC AAT TCT   | TCC ATG TTG CTG GGG TTC TG     | 109                    | 50.0          | 50.0          | 57.3           | 57.3           |
| Thyroxine binding globuline                    | <i>Tbg</i>     | TGG GCA TGT GCT ATC TTC A         | GAG TGG CAT TTT GTT GGG GC     | 153                    | 47.4          | 55.0          | 54.5           | 59.3           |
| UDP glucuronosyltransferase family 1 member a5 | <i>Ugt1a5</i>  | ATG CCC CTA CAA GGA TTA GTG G     | AGC ACC TTC TCA CCT TCA GTC    | 71                     | 50.0          | 52.4          | 60.3           | 59.8           |
